# Supplementary material for: Interleukin-8 (IL-8) as a Potential Mediator of an Association between Trimethylamine N-Oxide (TMAO) and Proprotein Convertase Subtilisin/Kexin Type 9 (PCSK9) among African Americans at Risk of Cardiovascular Disease
Source: MDPI journal article supplement (doi:10.3390/metabo12121196), 2022-11-30
Supplement: s1 [file s1]

| Variable     | BioMarker | Unadjusted Beta-value | Unadjusted P-value | Adjusted <sup>1</sup> Beta-value | Adjusted <sup>1</sup> P-value |
|--------------|-----------|-----------------------|--------------------|----------------------------------|-------------------------------|
| TMAO         | PCSK9     | 0.2984                | 0.023*             | 0.3149                           | 0.017*                        |
| IL-8         | PCSK9     | 0.2780                | 0.035*             | 0.2581                           | 0.051                         |
| IL-8         | TMAO      | 0.4284                | 0.001**            | 0.4537                           | <0.001**                      |
| IL1- $\beta$ | PCSK9     | 0.1015                | 0.452              | 0.9967                           | 0.470                         |
| IL1- $\beta$ | TMAO      | 0.3541                | 0.006**            | 0.3592                           | 0.007*                        |
| TNF $\alpha$ | PCSK9     | 0.1014                | 0.449              | 0.0995                           | 0.459                         |
| TNF $\alpha$ | TMAO      | 0.4442                | 0.000**            | 0.4284                           | 0.001*                        |
| IFN $\gamma$ | PCSK9     | 0.4150                | 0.001**            | 0.3893                           | 0.002*                        |
| IFN $\gamma$ | TMAO      | 0.0824                | 0.535              | 0.0895                           | 0.495                         |
| IL-18        | PCSK9     | -0.3338               | 0.035*             | -0.3247                          | 0.034*                        |
| IL-18        | TMAO      | -0.0794               | 0.617              | -0.0708                          | 0.655                         |

<sup>1</sup> Adjusted for ASCVD risk score and BMI.

Table S1: Results of Cytokine Association Analysis. ASCVD: atherosclerotic cardiovascular disease; BMI: body mass index; IL: interleukin; TNF: tumor necrosis factor; TMAO: Trimethylamine N-Oxide; PCSK9: Proprotein Convertase Subtilisin/Kexin Type 9. \* p<0.05, \*\* p<0.001
